# Supplementary material for: Disparate energy sources for slow and fast Dansgaard–Oeschger cycles
Source: Copernicus journal article supplement (doi:10.5194/cp-19-1447-2023), 2023-07-21
Supplement: Supplementary file 1 [file cp-19-1447-2023-supplement.pdf]

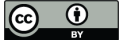

*Supplement of*

## **Disparate energy sources for slow and fast Dansgaard–Oeschger cycles**

**Diederik Liebrand et al.**

*Correspondence to:* Diederik Liebrand ([diederik@palaeoclimate.science](mailto:diederik@palaeoclimate.science)) and Anouk T. M. de Bakker ([anouk.debakker@deltares.nl](mailto:anouk.debakker@deltares.nl))

The copyright of individual parts of the supplement might differ from the article licence.

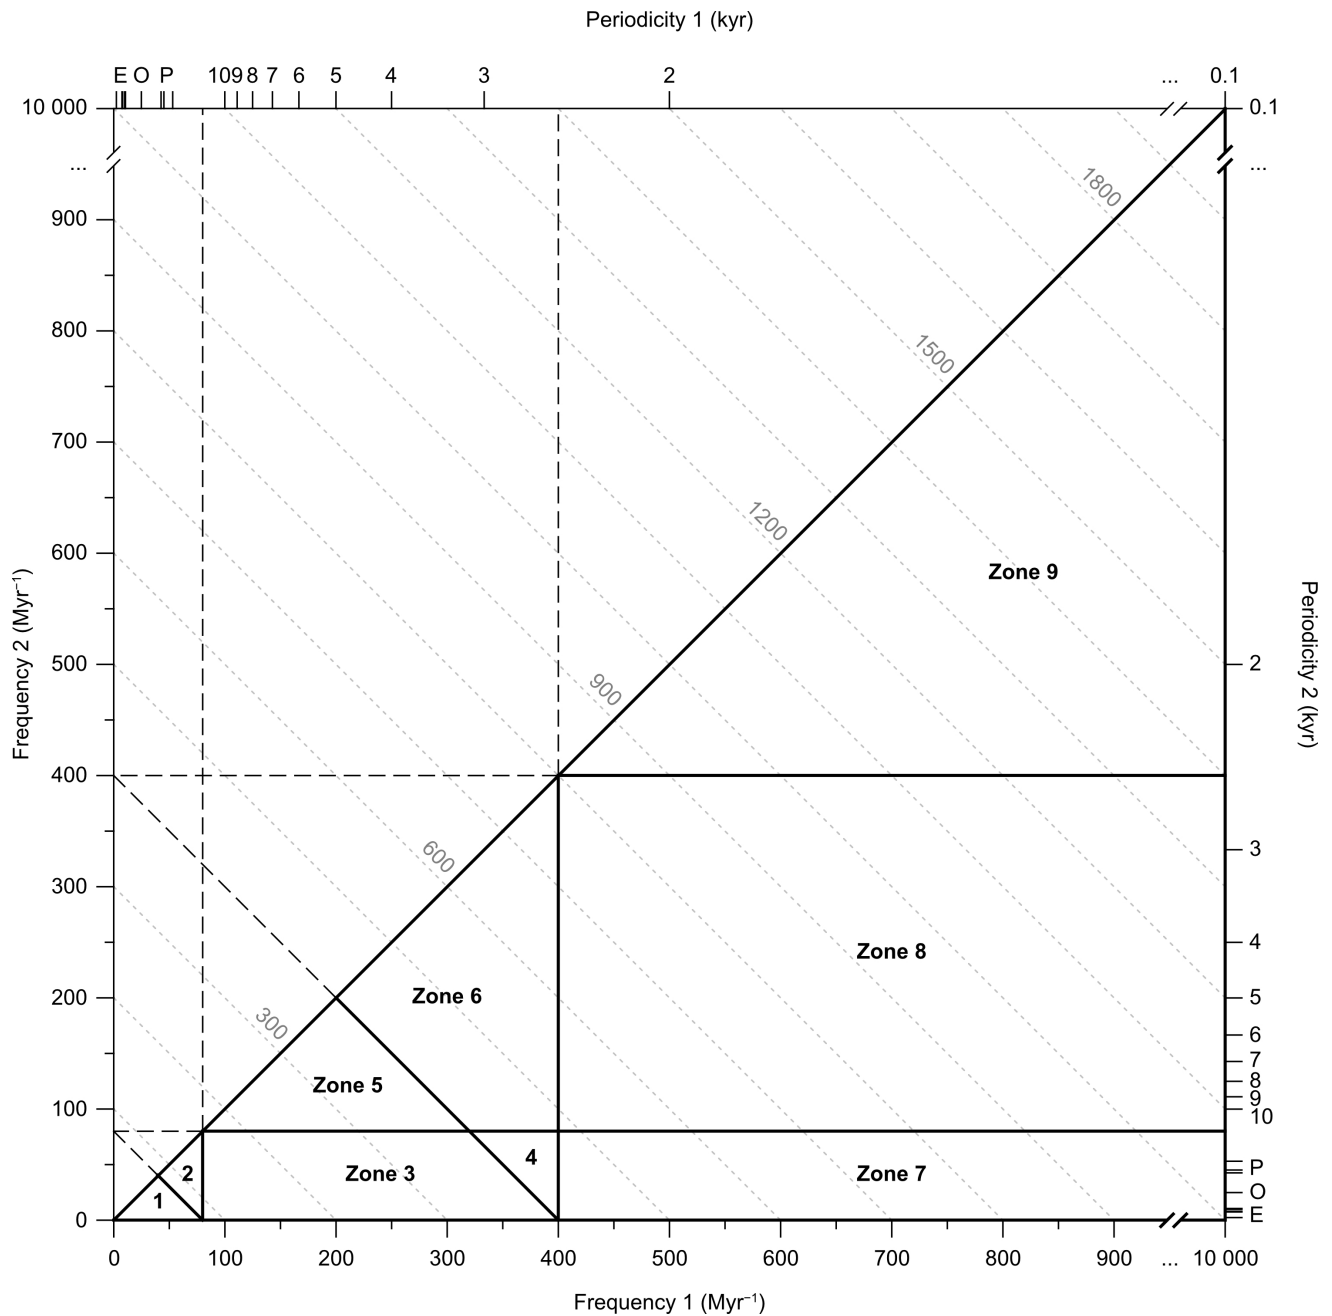

**Supplementary Figure S1.** Bispectral zonation scheme. Zone 1:  $B^{lm}(A, A, A)$ , Zone 2:  $B^{lm}(A, A, DO_s)$ , Zone 3:  $B^{lm}(DO_s, A, DO_s)$ , Zone 4:  $B^{lm}(DO_s, A, DO_F)$ , Zone 5:  $B^{lm}(DO_s, DO_s, DO_s)$ , Zone 6:  $B^{lm}(DO_s, DO_s, DO_F)$ , Zone 7:  $B^{lm}(DO_F, A, DO_F)$ , Zone 8:  $B^{lm}(DO_F, DO_s, DO_F)$ , and Zone 9:  $B^{lm}(DO_F, DO_F, DO_F)$ . “A” stands for astronomical periodicities, “DO<sub>s</sub>” stands for slow DO periodicities, and “DO<sub>F</sub>” stands for fast DO and centennial periodicities. The boundary between astronomical and slow DO cycles is set at  $f = 80 \text{ Myr}^{-1}$  (i.e.  $p = 12.5 \text{ kyr}$ ), and between slow DO and fast DO (and centennial) cycles at  $f = 400 \text{ Myr}^{-1}$  (i.e.  $p = 2.5 \text{ kyr}$ ). Frequency 3 (i.e.  $f_3$ ) is represented as diagonal lines in the bispectrum on the linear–linear scale, and  $f_3$ ’s values can be read off by summing  $f_1$  and  $f_2$  at any point along a diagonal.

| Zone    | Difference Frequency 1        | Difference Frequency 2        | Sum Frequency 3               | Bispectral notation   |
|---------|-------------------------------|-------------------------------|-------------------------------|-----------------------|
| Zone 1  | Astronomical cycles           | Astronomical cycles           | Astronomical cycles           | $B(A, A, A)$          |
| Zone 2  | Astronomical cycles           | Astronomical cycles           | Slow DO cycles                | $B(A, A, DO_S)$       |
| No zone | Astronomical cycles           | Astronomical cycles           | Fast DO and centennial cycles | N/A                   |
| No zone | Slow DO cycles                | Astronomical cycles           | Astronomical cycles           | N/A                   |
| Zone 3  | Slow DO cycles                | Astronomical cycles           | Slow DO cycles                | $B(DO_S, A, DO_S)$    |
| Zone 4  | Slow DO cycles                | Astronomical cycles           | Fast DO and centennial cycles | $B(DO_S, A, DO_F)$    |
| No zone | Slow DO cycles                | Slow DO cycles                | Astronomical cycles           | N/A                   |
| Zone 5  | Slow DO cycles                | Slow DO cycles                | Slow DO cycles                | $B(DO_S, DO_S, DO_S)$ |
| Zone 6  | Slow DO cycles                | Slow DO cycles                | Fast DO and centennial cycles | $B(DO_S, DO_S, DO_F)$ |
| No zone | Fast DO and centennial cycles | Astronomical cycles           | Astronomical cycles           | N/A                   |
| No zone | Fast DO and centennial cycles | Astronomical cycles           | Slow DO cycles                | N/A                   |
| Zone 7  | Fast DO and centennial cycles | Astronomical cycles           | Fast DO and centennial cycles | $B(DO_F, A, DO_F)$    |
| No zone | Fast DO and centennial cycles | Slow DO cycles                | Astronomical cycles           | N/A                   |
| No zone | Fast DO and centennial cycles | Slow DO cycles                | Slow DO cycles                | N/A                   |
| Zone 8  | Fast DO and centennial cycles | Slow DO cycles                | Fast DO and centennial cycles | $B(DO_F, DO_S, DO_F)$ |
| No zone | Fast DO and centennial cycles | Fast DO and centennial cycles | Astronomical cycles           | N/A                   |
| No zone | Fast DO and centennial cycles | Fast DO and centennial cycles | Slow DO cycles                | N/A                   |
| Zone 9  | Fast DO and centennial cycles | Fast DO and centennial cycles | Fast DO and centennial cycles | $B(DO_F, DO_F, DO_F)$ |

**Supplementary Table S1.** Bispectral zones. Zones correspond to Supp. Fig. S1. Certain combinations between the three periodicity bandwidths are listed but do not occur in the bispectrum. These interactions, marked by “N/A”, can be excluded as potential energy-transfer pathways.

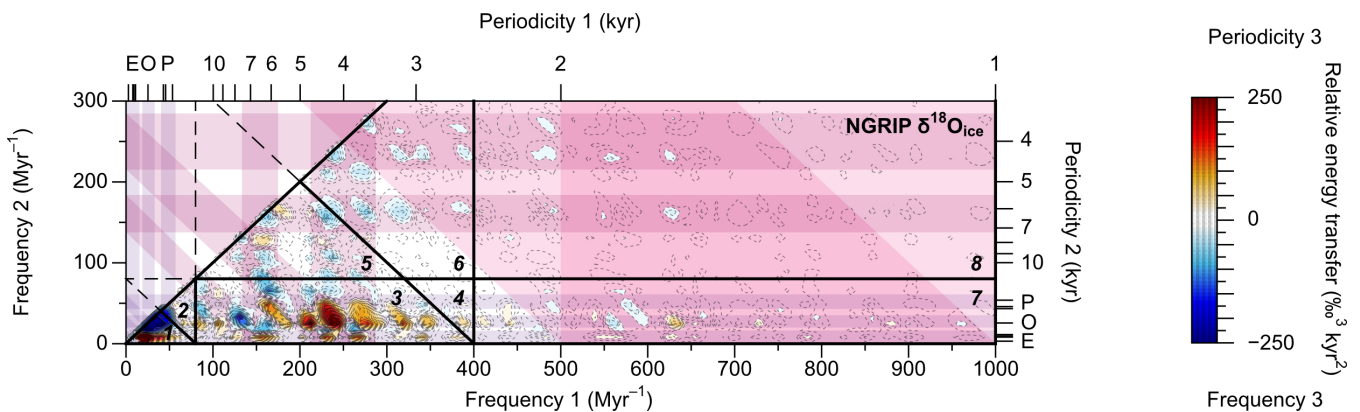

**Supplementary Figure S2.** Bispectrum of the NGRIP  $\delta^{18}O_{ice}$  record. The imaginary part of the bispectrum of the NGRIP  $\delta^{18}O_{ice}$  record. As in main Fig. 2, but here plotted on a linear-linear scale.

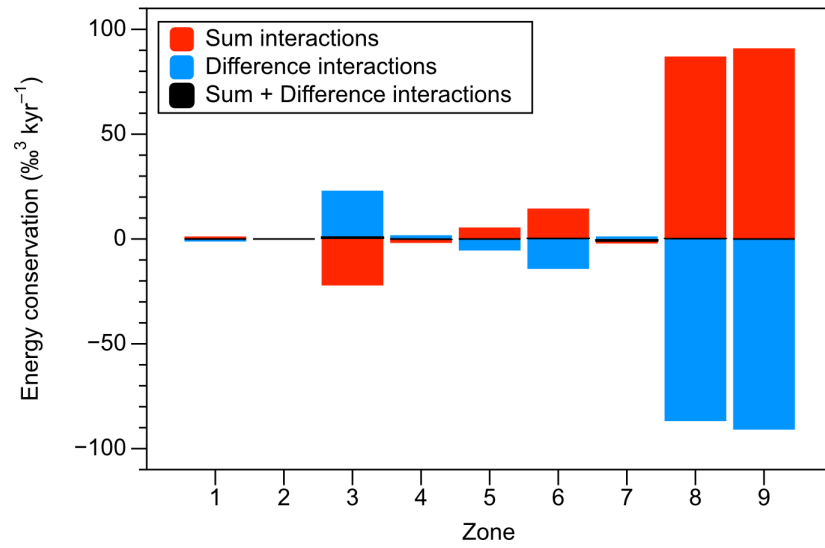

**Supplementary Figure S3.** Energy conservation (i.e. conservativity) of sum and difference interactions for each zone of the imaginary part of the bispectrum of the NGRIP  $\delta^{18}\text{O}_{\text{ice}}$  record.
